# Supplementary material
Source: publisher site journal article supplement (https://www.dovepress.com/article/444605)
Supplement: Supplementary file 1 [file get_supplementary_file.php]

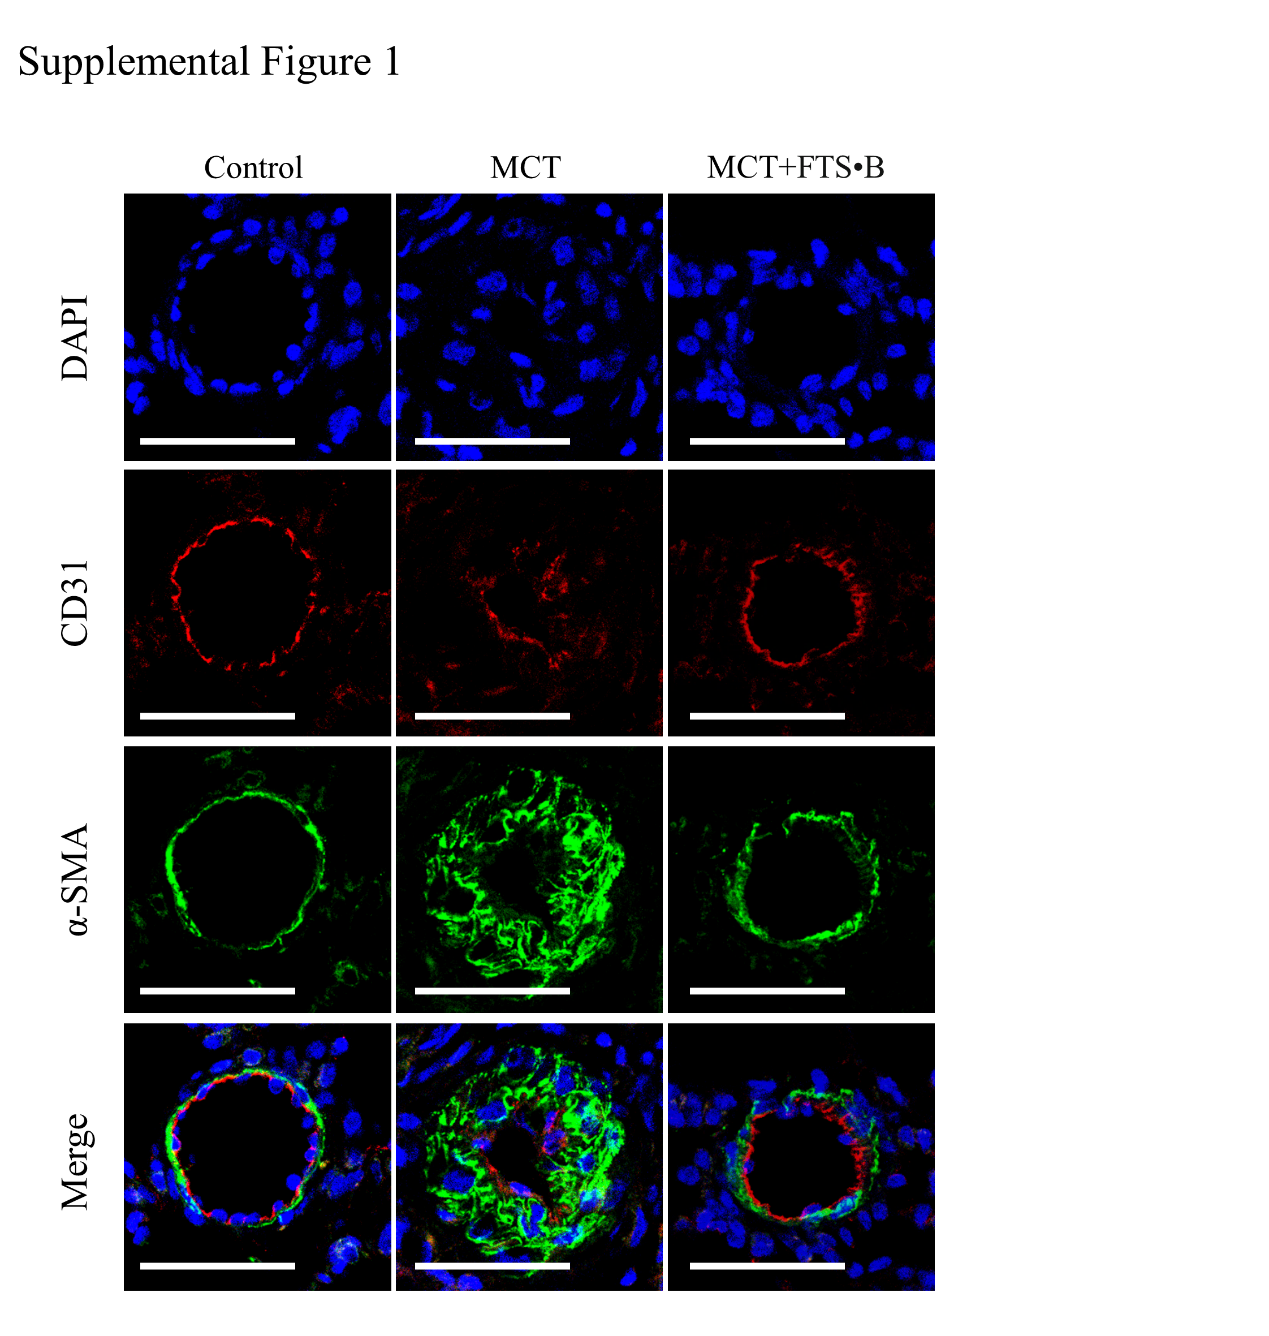


**Supplemental Figure 1.** **FTS•B suppress endothelial-to-mesenchymal transition in MCT-induced PAH.** Rats were subjected to MCT with/without FTS•B cotreatment. Representative images of CD31 immunofluorescence staining (CD31, red; DAPI, blue; α-SMA, green; scale bar = 50 μm). MCT, monocrotaline; FTS•B, forsythoside B, PAH, pulmonary arterial hypertension.


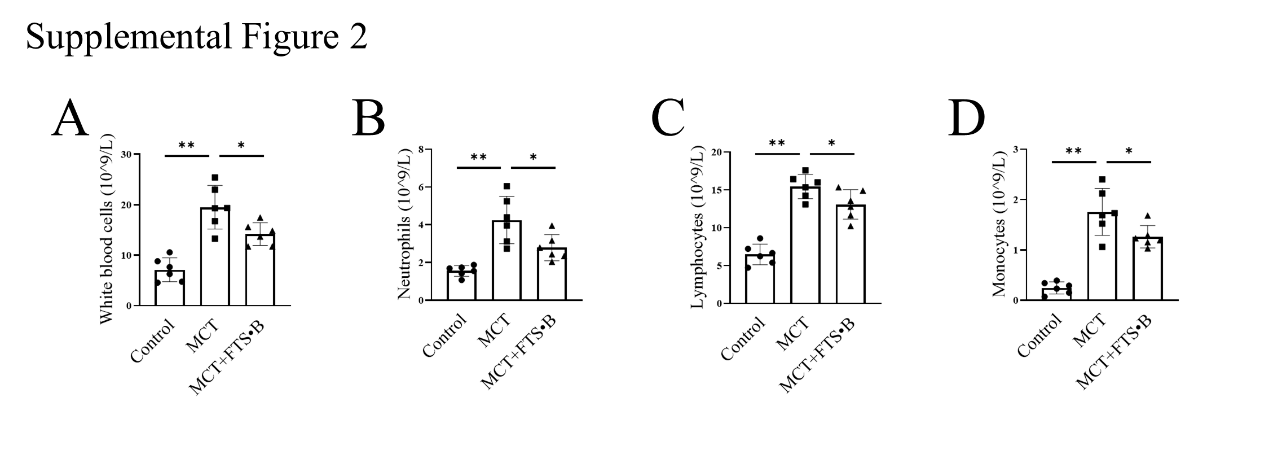


**Supplemental Figure 2. FTS•B restricted MCT-triggered blood cell increases.** Rats were subjected to MCT with/without FTS•B cotreatment. Quantitative analysis of total white blood cell (**A**), neutrophils (**B**), lymphocytes(**C**), monocytes(**D**) in blood (n=6). The data are presented as the mean ± SD. **p* < 0.05, ***p* < 0.01.MCT, monocrotaline; FTS•B, forsythoside B.


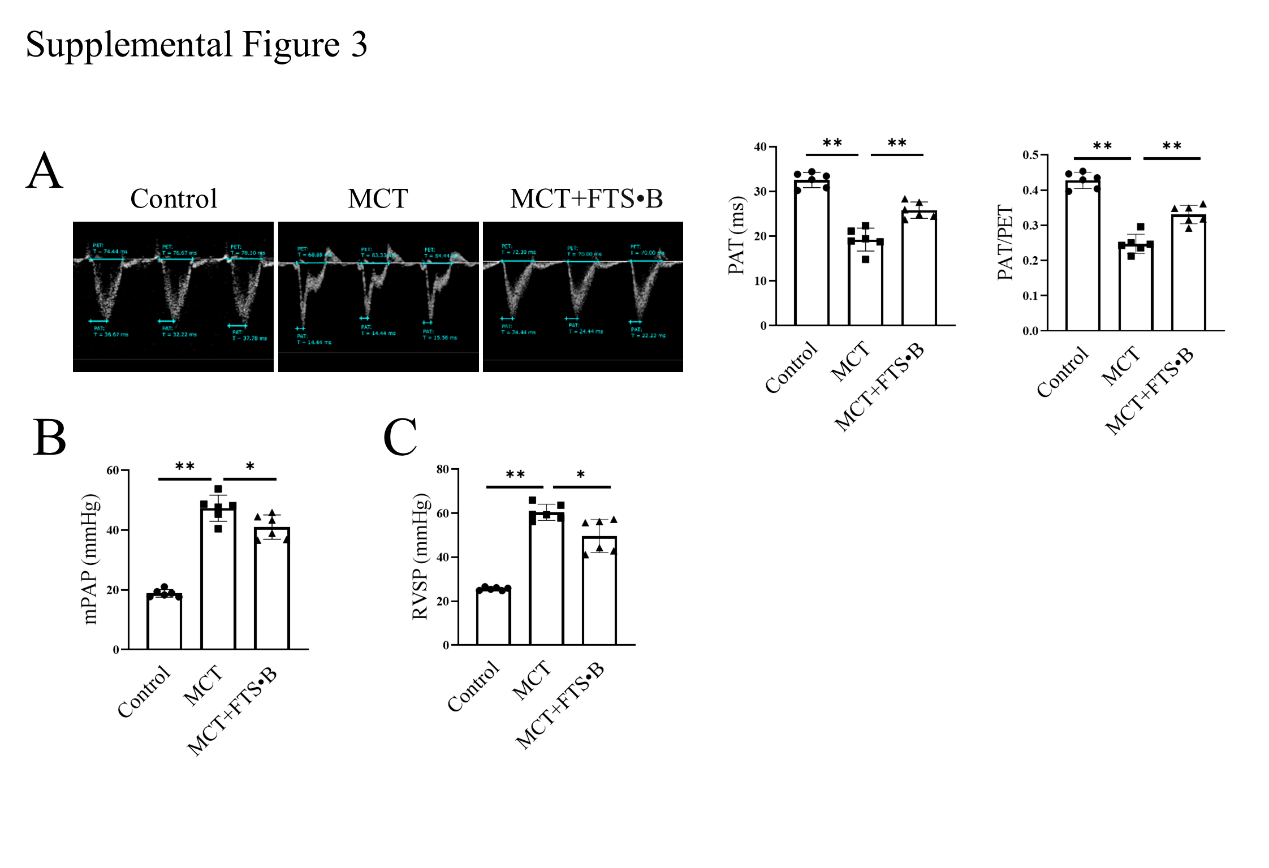
**Supplemental Figure 3. FTS•B relieved MCT-induced PAH**. Rats were given intraperitoneal injection of FTS•B (20 mg/kg, daily for 21 days) from Day 14 after MCT stimulation. **(A)** Echocardiographic PW doppler tracing of pulmonary artery outflow and quantitative data of PAT and PAT/PET (n = 6). Quantitative analysis of the mPAP **(B)** and RVSP **(C)** (n = 6). The data are presented as the mean ± SD. **p* < 0.05, ***p* < 0.01.MCT, monocrotaline; FTS•B, forsythoside B; PAH, pulmonary arterial hypertension; mPAP, mean pulmonary arterial pressure; RVSP, right ventricular systolic pressure; PAT, pulmonary artery acceleration time; PET, pulmonary arterial ejection time.


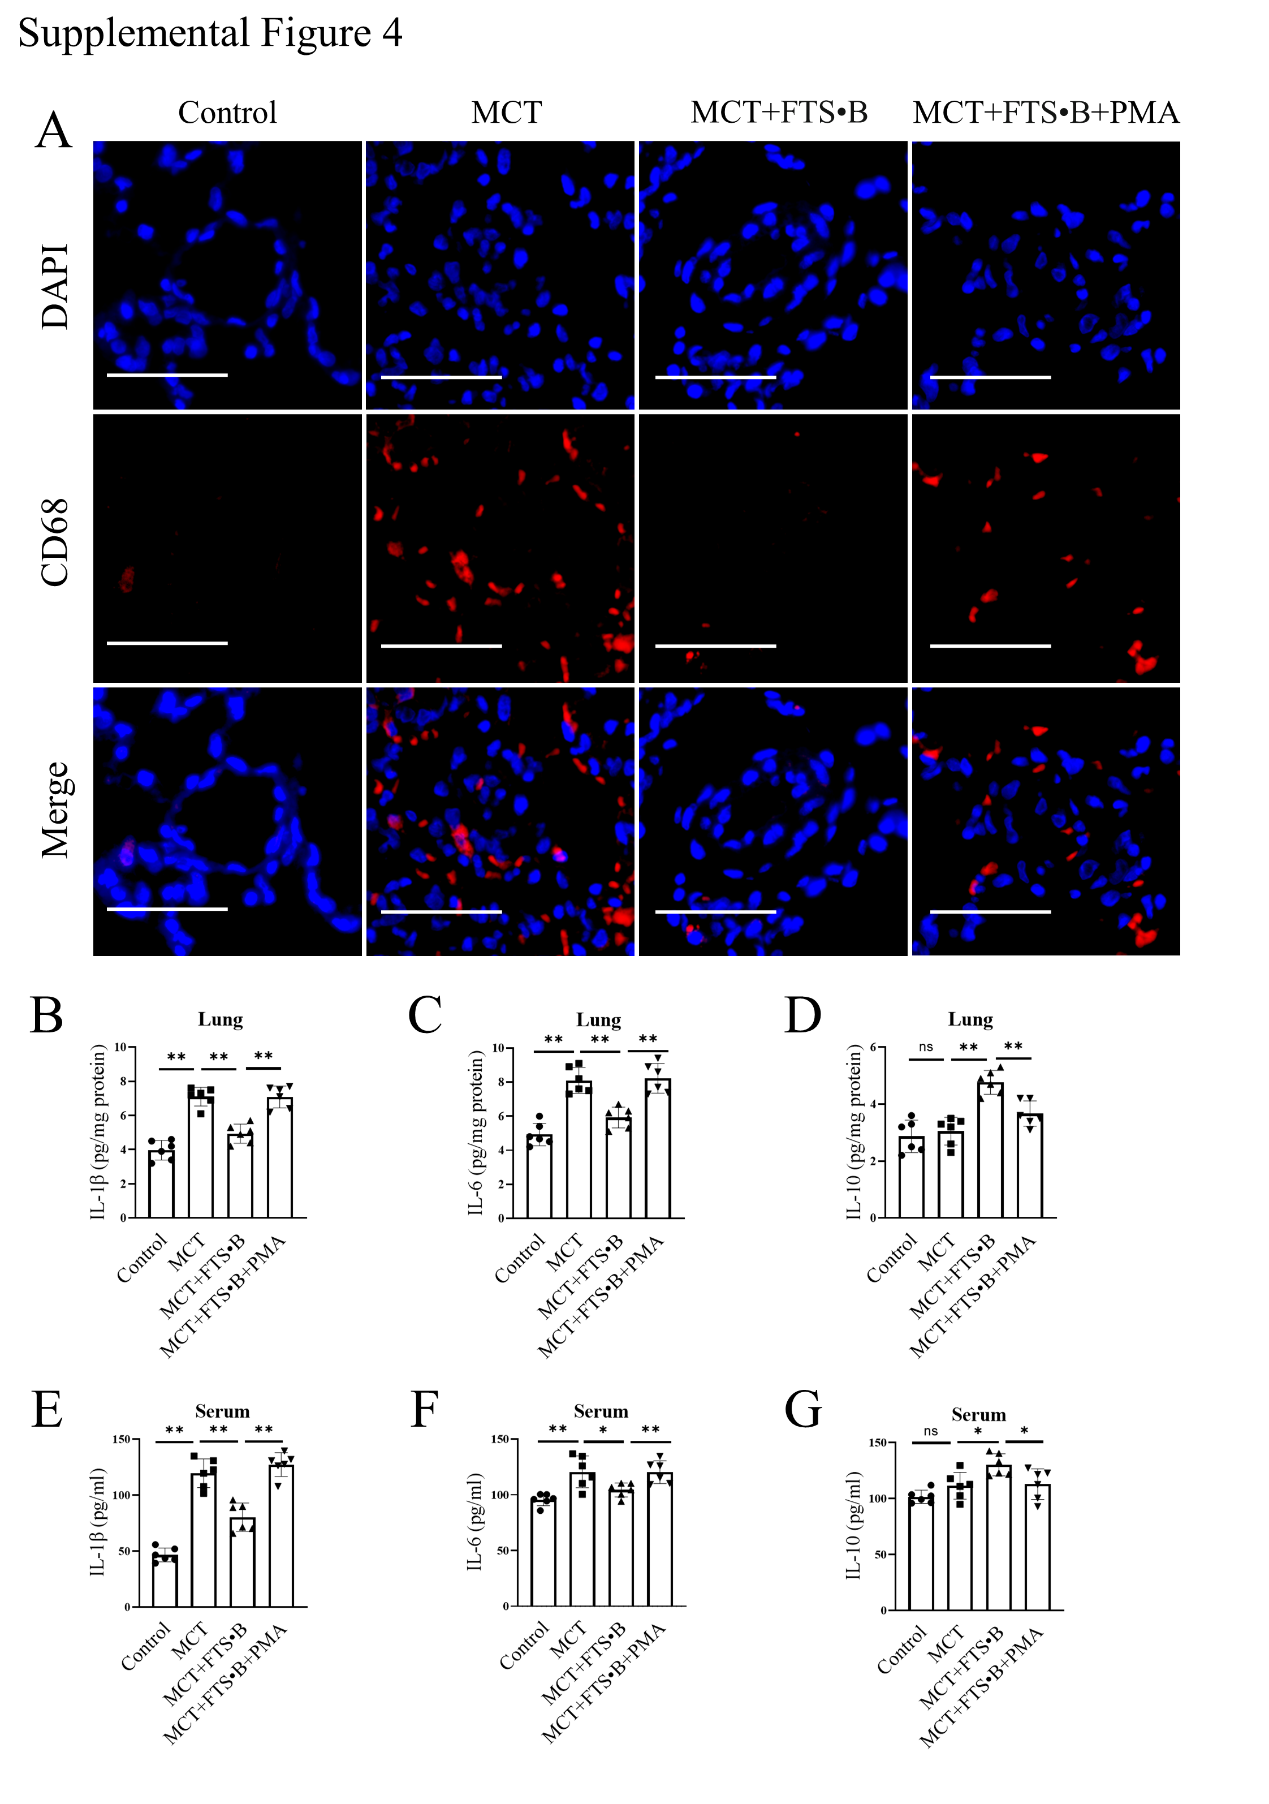


**Supplemental Figure 4.** **FTS•B repressed MCT-induced inflammatory response *in vivo*.** Rats were subjected to MCT and FTS•B with/without cotreatment with PMA. **(A)** Representative image of CD68 immunofluorescence staining (CD68, red; DAPI, blue; scale bar = 50 μm). Quantitative data of IL-1β **(B),** IL-6 **(C)** and IL-10(**D**)detected by ELISA in lung tissues (n = 6). Quantitative data of IL-1β **(E),** IL-6 **(F)** and IL-10(**G**) detected by ELISA in serum (n = 6). The data are presented as the mean ± SD. **p* < 0.05, ***p* < 0.01. MCT, monocrotaline; FTS•B, forsythoside B; PMA, phorbol-12-myristate-13-acetate; IL-1β: interleukin-1β; IL-6: interleukin-6; IL-10: interleukin-10.
